# Supplementary material for: Vat photopolymerization of tantalum-doped Li 7 La 3 Zr 2 O 12 electrolytes: a new Frontier in solid-state battery design
Source: Royal Society of Chemistry journal article supplement (doi:10.1039/d4ta06160h), 2024-11-01
Supplement: d4ta06160h1.pdf [file d4ta06160h1.pdf]

## Vat Photopolymerization of Tantalum-Doped $\text{Li}_7\text{La}_3\text{Zr}_2\text{O}_{12}$ Electrolytes: A New Frontier in Solid-State Battery Design

Diwakar Karuppiyah<sup>a,b</sup>, Dmitrii Komissarenko<sup>a</sup>, Tamanna Thakur<sup>a</sup>, Nur Sena Yüzbası<sup>a</sup>, Frank Clemens<sup>a</sup>, Elias Reisacher<sup>c</sup>, Pinar Kaya<sup>3</sup>, James Pikul<sup>b</sup>, Gurdial Blugan<sup>\*a</sup>

<sup>a</sup>Laboratory for High Performance Ceramics, Empa, Swiss Federal Laboratories for Materials Science and Technology, Überlandstrasse 129, 8600, Dübendorf, Switzerland

<sup>b</sup>Department of Mechanical Engineering, University of Wisconsin Madison, 53705 USA

<sup>c</sup>Materials Research Institute Aalen (IMFAA), Aalen University of Applied Sciences, Beethovenstraße 1, 73430 Aalen, Germany

### Supplementary Information (SI)

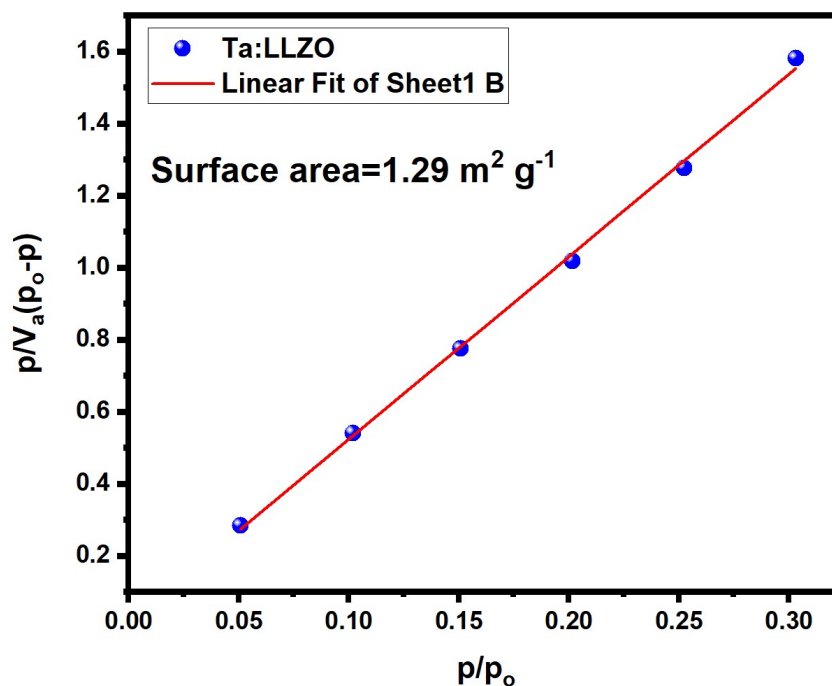

**Figure S1:** BET plot Ta-LLZO using points collected at the pressure range 0.05 to 0.3

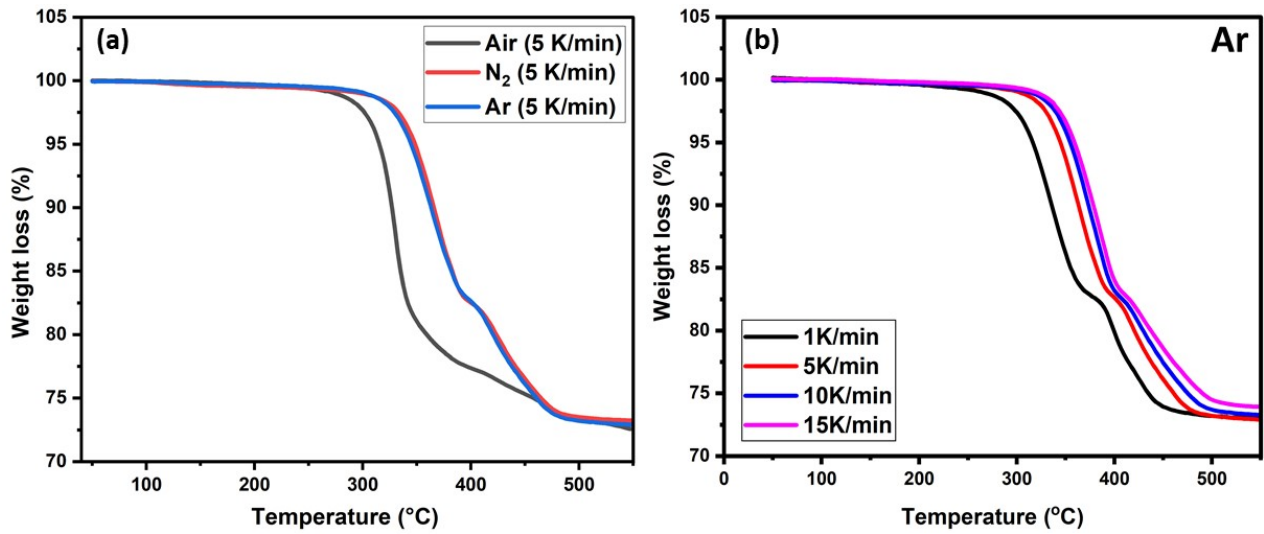

**Figure S2:** The TGA curves of the green bodies performed in (a) three different atmospheres, namely synthetic air, nitrogen and argon; (b) TGA analysis in argon at different heating rates for kinetic analysis

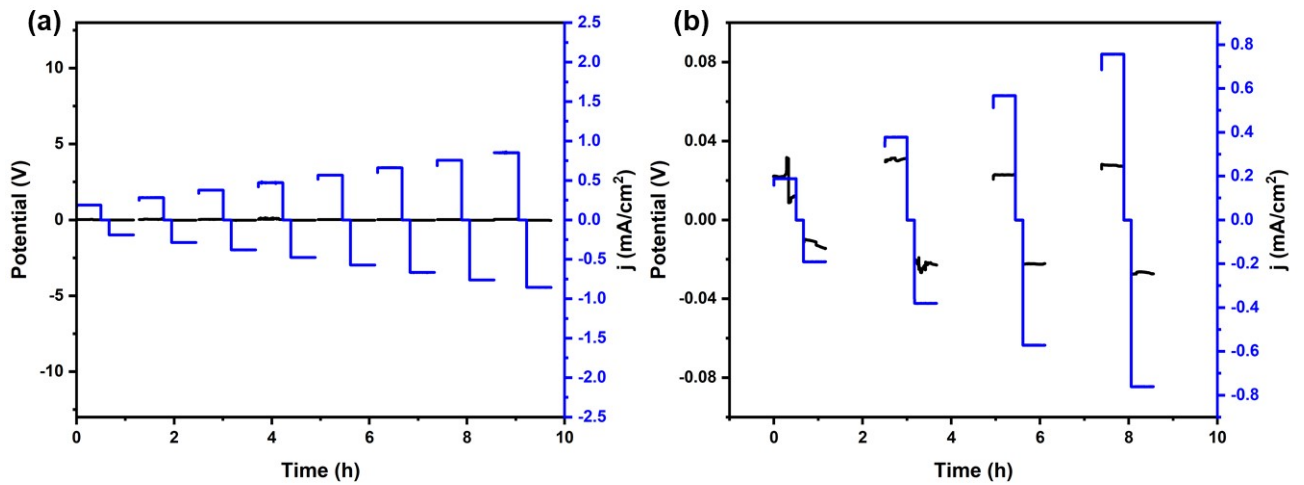

**Figure S3:** Stepped current density GC for Li/LLZ:Ta/Li cell at 25 °C (The step width for changing current density is 100  $\mu\text{A cm}^{-2}$  with a stack pressure of 3 MPa)
